# Supplementary material for: Chronic consumption of a bergamot-based beverage does not affect glucose, lipid and inflammatory biomarkers of cardiometabolic risk in healthy subjects: a randomised controlled intervention study
Source: Royal Society of Chemistry journal article supplement (doi:10.1039/d4fo00877d), 2024-01-01

## SUPPLEMENTAL MATERIAL

### **Chronic consumption of a bergamot-based beverage does not affect glucose, lipid and inflammatory biomarkers of cardiometabolic risk in healthy subjects: a randomised controlled intervention study.**

#### **Supplementary Materials and Methods**

##### **Urine sample analysis for the determination of phenolic metabolites**

Urinary extraction of phenolic metabolites was performed using microelution solid phase extraction ( $\mu$ SPE) through a 96 well  $\mu$ -SPE HLB plate (Oasis® HLB  $\mu$ Elution Plate 30  $\mu$ m, Waters) according to validated protocols, with some modifications (Feliciano, R. P., Boeres, A., Massacessi, L., Istas, G., Ventura, M. R., Nunes dos Santos, C., Heiss, C., & Rodriguez-Mateos, A. Identification and quantification of novel cranberry-derived plasma and urinary (poly)phenols. Archives of Biochemistry and Biophysics, 2016, **599**, 31–41. Feliciano, R. P., Mecha, E., Bronze, M. R., & Rodriguez-Mateos, A. Development and validation of a high-throughput micro solid-phase extraction method coupled with ultra-high-performance liquid chromatography-quadrupole time-of-flight mass spectrometry for rapid identification and quantification of phenolic metabolites in human plasma and urine. Journal of Chromatography A, 2016, **1464**, 21–31.). Briefly, urine samples (100  $\mu$ L) were diluted with acidified water (0.1% formic acid) (1:5, v/v). Another sample dilution (350  $\mu$ L) was performed with water containing 4% (v/v) of *orto*-phosphoric acid to reduce phenolic-protein interactions. Each sample (600  $\mu$ L) was loaded on the 96-well plate, washed with water (200  $\mu$ L) and water acidified with 0.2% (v/v) acetic acid (200  $\mu$ L), and finally eluted in a clean plate, containing 40  $\mu$ L of water in each well, in three steps, using acidified methanol (0.1% v/v formic acid) containing 10 nmol/L ammonium formate solution (30  $\mu$ L for each elution step). Samples were analyzed by ultra-high performance liquid chromatography coupled with tandem mass spectrometry (uHPLC-ESI-MS/MS) to identify and quantify phenolic metabolites. An UHPLC DIONEX Ultimate 3000 fitted with a TSQ Vantage Triple Quadrupole Mass Spectrometer (QQ-MS) (Thermo Fisher

Scientific Inc., San Jose, CA, USA), equipped with a heated-electrospray ionization source (H-ESI-II; Thermo Fisher Scientific Inc.) was used. Separation was carried out by means of Kinetex Evo C18 column (100 x 2.1 mm; 2.6  $\mu$ m particle size; Phenomenex, CA, USA) installed with a precolumn cartridge (Phenomenex, CA, USA). Urine separation was carried out by means of Kinetex Evo C18 column (100 x 2.1 mm; 2.6  $\mu$ m particle size; Phenomenex, CA, USA) installed with a precolumn cartridge (Phenomenex, CA, USA). For uHPLC, mobile phase A was water containing 0.01% formic acid and mobile phase B was acetonitrile containing 0.01% formic acid. The gradient started with 5% B, keeping isocratic conditions for 0.5 min, reaching 95% B at 7 min, followed by 1 min at 95% B and then 4 min at the start conditions to re-equilibrate the column. The flow rate was set at 0.4 mL/min, the injection volume was 5  $\mu$ L, and the column was thermostatted at 40 °C. The MS worked in negative ionization mode with a capillary temperature of 270 °C, while the source was set at 300 °C. The sheath gas flow was 60 units, while auxiliary gas pressure was set to 10 units. The source voltage was 3 kV. Ultra-high purity argon gas was used for collision-induced dissociation (CID).

Up to 120 compounds were simultaneously monitored in selective reaction monitoring (SRM) mode (ESI Table S2). Chromatograms, mass spectral data and data processing were performed using Xcalibur software 2.1 (Thermo Fisher Scientific Inc.). Metabolite identification was carried out by comparison of the retention time with standards, when available, and/or MS/MS fragmentation patterns. Quantification was performed with calibration curves of standards, when available; when not available, compounds were quantified with the most structurally similar compound.

Urinary excretions of phenolic metabolites were reported for each identified compound. Moreover, total amounts of urinary metabolites belonging to the same (poly)phenolic class were calculated, defining 10 groups, as well as total amounts of metabolites belonging to the same aglycone moiety, defining 22 groups (23 if hippuric acid derivatives were considered). Standards used for urinary (poly)phenol metabolites and catabolites identification and quantification are the following: 4-Hydroxybenzaldehyde, 3,4-dihydroxybenzaldehyde, 4-hydroxybenzoic acid, 3,4-dihydroxybenzoic acid, 3-(4'-hydroxyphenyl)propanoic acid, 3-(3'-hydroxyphenyl)propanoic acid, 3-(3',4'-

dihydroxyphenyl)propanoic acid, 3-(4'-hydroxy-3'-methoxyphenyl)propanoic acid, 4'-hydroxy-3'-methoxycinnamic acid, 4'-hydroxyphenylacetic acid, 3'-hydroxyphenylacetic acid, 3',4'-dihydroxyphenylacetic acid and hippuric acid were purchased from Sigma-Aldrich (St. Louis, MO, USA). 3'-Methoxycinnamic acid-4'-sulfate, 3'-methoxycinnamic acid-4'-glucuronide, 4'-methoxycinnamic acid-3'-sulfate, 4'-methoxycinnamic acid-3'-glucuronide, 3-(3'-methoxyphenyl)propanoic acid-4'-sulfate, 3-(4'-methoxyphenyl)propanoic acid-3'-glucuronide, 3-(4'-hydroxyphenyl)propanoic acid-3'-sulfate, 3-(4'-hydroxyphenyl)propanoic acid-3'-glucuronide, 3'-hydroxycinnamic acid-4'-glucuronide, 4'-hydroxycinnamic acid-3'-glucuronide, naringenin-4'-glucuronide, naringenin-7-glucuronide and hesperetin-3'-glucuronide were purchased from Toronto Research Chemicals (Toronto, ON, Canada). Hesperetin-7-glucuronide was purchased from Santa Cruz Biotechnology (Santa Cruz, California, USA). 4-Hydroxy-3-methoxybenzoic acid was purchased from Alfa Aesar (Thermo Fisher (Kandel) GmbH, Postfach, Karlsruhe, Germany), and 4'-hydroxy-3'-phenylacetic acid were purchased from Extrasynthese (Genay Cedex, France). 4'-Hydroxyhippuric acid was purchased from Bachem Ltd. (St Helens, UK). Prof. Alan Crozier (University of Glasgow) kindly supplied feruloylglycine. 3-Methoxybenzoic acid-4-glucuronide, 3-methoxybenzoic acid-4-sulfate, 4-methoxybenzoic acid-3-glucuronide, 4-hydroxybenzoic acid-3-sulfate, 4-hydroxybenzoic acid-3-glucuronide, benzoic acid-4-sulfate, benzoic acid-4-glucuronide were provided by Dr. Colin Kay (N.C. State University's Plants for Human Health Institute). Ultrapure water from MilliQ system (Millipore, Bedford, MA, USA) was used throughout the experiment.

### *Statistical analyses*

Principal Component Analysis (PCA) (ESI Figure S1A) was used to assess the differences in the phenolic profiles among treatments (control or bergamot) and times (T1 and T2). Data were pre-treated with mean-centering and UV-scaling, and two principal components (PCs) were set (PC1 and PC2). Centering converted all the data to variations around zero instead of around the mean of the data; UV scaling used standard deviation as scaling factor to give all variables equal weight. The

parameters used to assess the quality of each model and subsequent data interpretability were  $R^2X$  and  $Q^2$ , namely the model fit (or explained variation) and the predictive ability, respectively.

Partial least squares discriminant analysis (PLS-DA) (ESI Figure S1B) was applied to improve the stratification of subjects in the treatment groups and predict which metabolites characterized those groups. Two clusters (BBB group and control group) were defined according to the treatment type, and observations were assigned to clusters based on the treatment type. (Poly)phenolic classes were considered as variables and were autoscaled applying centering plus UV scaling. Model validity was assessed by  $R^2X$  (variation in the data),  $R^2Y$  (variation in the cluster),  $Q^2$  (goodness of fit of the validation), the random permutation test, and CV-ANOVA. The most relevant metabolites for clustering were identified using the Variable Importance in the Projection (VIP) scores (ESI Figure S2). Variables with VIP greater than 1.25 were considered relevant for the model. The ROC curve was built to assess the classification performance of the model (ESI Figure S3). Both PCA and PLS-DA were performed using SIMCA 16.0.1 software (Sartorius Stedim Data Analytics, Umea, Sweden).

**ESI Table S1.** Chromatographic and spectrometric properties of the monitored flavanone and flavone metabolites. Nomenclature of metabolites is reported as proposed by Kay et al (30). Synonyms are reported under brackets, as well as abbreviations. RT means retention time; CE means collision energy; / means not detected; STD means standard use for the quantification.

| Compound                                                         | RT<br>(min) | Parent ion<br>[M-H] <sup>-</sup><br>( <i>m/z</i> ) | S-Lens | Quantifier                 |        | Qualifier(s)               |                | STD                       |
|------------------------------------------------------------------|-------------|----------------------------------------------------|--------|----------------------------|--------|----------------------------|----------------|---------------------------|
|                                                                  |             |                                                    |        | Product ion ( <i>m/z</i> ) | CE (V) | Product ion ( <i>m/z</i> ) | CE (V)         |                           |
| HMG-flavanone metabolites                                        |             |                                                    |        |                            |        |                            |                |                           |
| Naringenin-7- <i>O</i> -glucoside-6''- <i>O</i> -HMG             | -           | 577                                                | 100    | 271                        | 25     | 463, 445, 433, 475         | 20, 20, 20, 20 |                           |
| Naringenin-7- <i>O</i> -glucoside-6''- <i>O</i> -HMG-glucuronide | -           | 753                                                | 115    | 271                        | 25     | 577                        | 25             |                           |
| Naringenin-7- <i>O</i> -glucoside-6''- <i>O</i> -HMG-sulfate     | -           | 657                                                | 115    | 271                        | 25     | 577, 113                   | 25, 25         |                           |
| Hesperetin-7- <i>O</i> -glucoside-6''- <i>O</i> -HMG             | -           | 607                                                | 100    | 301                        | 25     | 493, 475, 463, 505         | 20, 20, 20, 20 |                           |
| Hesperetin-7- <i>O</i> -glucoside-6''- <i>O</i> -HMG-glucuronide | -           | 783                                                | 115    | 301                        | 25     | 607                        | 25             |                           |
| Hesperetin-7- <i>O</i> -glucoside-6''- <i>O</i> -HMG-sulfate     | -           | 687                                                | 115    | 301                        | 25     | 607, 113                   | 25, 25         |                           |
| Structurally-related flavanone metabolites                       |             |                                                    |        |                            |        |                            |                |                           |
| Naringenin (Nar)                                                 | -           | 271                                                | 84     | 177                        | 16     | 118, 93                    | 24, 24         |                           |
| Naringenin-5-glucuronide (Nar-5-Glc)                             | -           | 447                                                | 100    | 271                        | 25     | 151, 175, 113              | 34, 27, 27     |                           |
| Naringenin-7-glucuronide (Nar-7-Glc)                             | 5.25        | 447                                                | 100    | 271                        | 25     | 151, 175, 113              | 34, 27, 27     | Naringenin-7-glucuronide  |
| Naringenin-4'-glucuronide (Nar-4'-Glc)                           | 5.35        | 447                                                | 100    | 271                        | 25     | 151, 113, 175              | 34, 27, 27     | Naringenin-4'-glucuronide |

|                                                 |      |     |     |     |    |                     |                |                           |
|-------------------------------------------------|------|-----|-----|-----|----|---------------------|----------------|---------------------------|
| Naringenin-sulfate (Nar-S)                      | 7.80 | 351 | 100 | 271 | 26 | 151, 231            | 34, 25         | Quercetin-3'-sulfate      |
| Naringenin-diglucuronide (Nar-diGlc)            | 5.00 | 623 | 100 | 447 | 25 | 271, 175, 113       | 26, 27, 27     | Naringenin-7-glucuronide  |
| Naringenin-disulfate (Nar-diS)                  | -    | 431 | 100 | 271 | 26 | 151, 231            | 34, 25         |                           |
| Naringenin-sulfate-glucuronide (Nar-S-Glc)      | 5.45 | 527 | 100 | 351 | 26 | 447, 271            | 26, 26         | Naringenin-7-glucuronide  |
| Isosakuranetin (Isok)                           | 6.55 | 285 | 80  | 270 | 18 |                     |                | (-)-Epicatechin           |
| Isosakuranetin-glucuronide (Isok-Glc)           | -    | 461 | 90  | 285 | 35 | 113, 175, 151       | 18, 27, 39     |                           |
| Isosakuranetin-sulfate (Isok-S)                 | -    | 365 | 90  | 285 | 20 | 270                 | 20             |                           |
| Isosakuranetin-sulfate-glucuronide (Isok-S-Glc) | -    | 541 | 115 | 461 | 26 | 365, 285            | 25, 25         |                           |
| Eriodyctiol (Erio)                              | -    | 287 | 80  | 151 | 39 |                     |                |                           |
| Eriodyctiol-glucuronide (Erio-Glc)              | -    | 463 | 90  | 287 | 25 | 151, 113            | 39, 27         |                           |
| Eriodyctiol-sulfate (Erio-S)                    | -    | 367 | 90  | 287 | 20 | 151                 | 39             |                           |
| Eriodyctiol-sulfate-glucuronide (Erio-S-Glc)    | -    | 543 | 115 | 463 | 26 | 367, 287            | 25, 25         |                           |
| Hesperetin (Hes)                                | 6.05 | 301 | 80  | 151 | 39 | 286                 | 25             | (-)-Epicatechin           |
| Hesperetin-5-glucuronide (Hes-5-Glc)            | -    | 477 | 100 | 301 | 27 | 151, 113            | 46, 27         |                           |
| Hesperetin-7-glucuronide (Hes-7-Glc)            | 5.40 | 477 | 100 | 301 | 27 | 113, 286, 175, 151  | 27, 35, 27, 46 | Hesperetin-7-glucuronide  |
| Hesperetin-3'-glucuronide (Hes-3'-Glc)          | 5.50 | 477 | 100 | 301 | 27 | 113, 286, 175, 151  | 27, 35, 27, 46 | Hesperetin-3'-glucuronide |
| Hesperetin-sulfate (Hes-S)                      | 7.90 | 381 | 100 | 301 | 26 | 151, 286            | 39, 35         | Quercetin-3'-sulfate      |
| Hesperetin-diglucuronide (Hes-diGlc)            | 5.30 | 653 | 100 | 477 | 26 | 301, 113, 175, 151, | 26, 27, 27,    | Hesperetin-7-glucuronide  |

|                                                                                     |      |     |     |     |    |                    |                |                                        |
|-------------------------------------------------------------------------------------|------|-----|-----|-----|----|--------------------|----------------|----------------------------------------|
|                                                                                     |      |     |     |     |    | 286                | 39, 30         |                                        |
| Hesperetin-disulfate (Hes-diS)                                                      | -    | 461 | 100 | 381 | 26 | 301, 286, 151      | 26, 35, 39     |                                        |
| Hesperetin-sulfate-glucuronide (Hes-S-Glc)                                          | 5.80 | 557 | 100 | 381 | 26 | 113, 175, 477, 301 | 27, 27, 26, 26 | Hesperetin-7-glucuronide               |
| <b>Structurally-related flavone metabolites</b>                                     |      |     |     |     |    |                    |                |                                        |
| Apigenin (Api)                                                                      | -    | 269 | 98  | 151 | 30 | 149, 117           | 30, 26         |                                        |
| Apigenin-glucuronide (Api-Glc)                                                      | 5.35 | 445 | 90  | 269 | 20 | 113, 225           | 30, 30         | Naringenin-7-glucuronide               |
| Apigenin-sulfate (Api-S)                                                            | -    | 349 | 100 | 269 | 20 | 225                | 30             |                                        |
| Luteolin (Lut)                                                                      | -    | 285 | 88  | 151 | 20 | 133                | 20             |                                        |
| Luteolin-glucuronide (Lut-Glc)                                                      | -    | 461 | 90  | 285 | 27 | 113, 151           | 30, 39         |                                        |
| Luteolin-sulfate (Lut-S)                                                            | -    | 365 | 90  | 285 | 20 | 257                | 30             |                                        |
| Diosmetin (Dios)                                                                    | 6.00 | 299 | 88  | 284 | 25 | 256                | 25             | (-)-Epicatechin                        |
| Diosmetin-glucuronide (Dios-Glc)                                                    | 5.45 | 475 | 93  | 299 | 27 | 113                | 30             | Hesperetin-7-glucuronide               |
| Diosmetin-sulfate (Dios-Glc)                                                        | -    | 379 | 93  | 299 | 20 | 284                | 35             |                                        |
| <b>Cinnamic acids (HCAs)</b>                                                        |      |     |     |     |    |                    |                |                                        |
| 3',4'-Dihydroxycinnamic acid (Caffeic acid) (3',4'-diHCA)                           | 3.80 | 179 | 62  | 135 | 19 |                    |                | 3',4'-Dihydroxycinnamic acid           |
| 3'-Hydroxycinnamic acid-4'-glucuronide (Caffeic acid-4-glucuronide) (3'-HCA-4'-Glc) | 3.10 | 355 | 98  | 179 | 21 | 113                | 18             | 3'-Hydroxycinnamic acid-4'-glucuronide |
| 4'-Hydroxycinnamic acid-3'-glucuronide (Caffeic                                     | 4.10 | 355 | 98  | 179 | 21 | 113                | 18             | 4'-Hydroxycinnamic acid-               |

|                                                                                           |      |     |    |     |    |               |          |                                               |
|-------------------------------------------------------------------------------------------|------|-----|----|-----|----|---------------|----------|-----------------------------------------------|
| acid-3-glucuronide) (4'-HCA-3'-Glc)                                                       |      |     |    |     |    |               |          | 3'-glucuronide                                |
| 3'-Hydroxycinnamic acid-4'-sulfate (Caffeic acid-3-sulfate) (3'-HCA-4'-S)                 | 5.00 | 259 | 62 | 179 | 20 | 135           | 25       | 3-(4'-Hydroxyphenyl)propanoic acid-3'-sulfate |
| 4'-Hydroxycinnamic acid-3'-sulfate (Caffeic acid-4-sulfate) (4'-HCA-3'-S)                 | 5.50 | 259 | 62 | 179 | 20 | 135           | 25       | 3-(4'-Hydroxyphenyl)propanoic acid-3'-sulfate |
| 4'-Hydroxy-3'-methoxycinnamic acid (Ferulic acid) (3'-MeO-4'-HCA)                         | 4.74 | 193 | 71 | 134 | 19 | 178           | 18       | 4'-Hydroxy-3'-methoxycinnamic acid            |
| 3'-Hydroxy-4'-methoxycinnamic acid (Isoferulic acid) (4'-MeO-3'-HCA)                      | -    | 193 | 71 | 134 | 19 | 178           | 18       |                                               |
| 3'-Methoxycinnamic acid-4'-glucuronide (Ferulic acid-4-glucuronide) (3'-MeO-CA-4'-Glc)    | 3.90 | 369 | 93 | 193 | 20 | 113, 134, 178 | 18,39,32 | 3'-Methoxycinnamic acid-4'-glucuronide        |
| 4'-Methoxycinnamic acid-3'-glucuronide (Isoferulic acid-3-glucuronide) (4'-MeO-CA-3'-Glc) | 4.44 | 369 | 93 | 113 | 18 | 178, 193, 134 | 32,20,39 | 4'-Methoxycinnamic acid-3'-glucuronide        |
| 3'-Methoxycinnamic acid-4'-sulfate (Ferulic acid-4-sulfate) (3'-MeO-CA-4'-S)              | 5.40 | 273 | 92 | 193 | 18 | 178, 134, 149 | 28,33,30 | 3'-Methoxycinnamic acid-4'-sulfate            |
| 4'-Methoxycinnamic acid-3'-sulfate (Isoferulic acid-3-sulfate) (4'-MeO-CA-3'-S)           | 5.64 | 273 | 92 | 193 | 18 | 178, 134      | 28,33    | 4'-Methoxycinnamic acid-3'-sulfate            |
| Feruloylglycine (Fer-Gly)                                                                 | 4.38 | 250 | 79 | 206 | 14 | 134, 163      | 22,19    | Feruloylglycine                               |
| 2'-Hydroxycinnamic acid ( <i>o</i> -Coumaric acid) (2'-HCA)                               | 5.00 | 163 | 62 | 119 | 19 | 93            | 38       | 2'-Hydroxycinnamic acid                       |
| 3'-Hydroxycinnamic acid ( <i>m</i> -Coumaric acid) (3'-HCA)                               | 4.77 | 163 | 62 | 119 | 19 | 93            | 38       | 3'-Hydroxycinnamic acid                       |
| 4'-Hydroxycinnamic acid ( <i>p</i> -Coumaric acid) (4'-                                   | 4.54 | 163 | 62 | 119 | 19 | 93            | 38       | 3'-Hydroxycinnamic acid                       |



HCA)

|                                                                        |      |     |    |     |    |     |    |                                                   |
|------------------------------------------------------------------------|------|-----|----|-----|----|-----|----|---------------------------------------------------|
| Cinnamic acid-4'-glucuronide (Coumaric acid-4-glucuronide) (CA-4'-Glc) | 4.48 | 339 | 90 | 163 | 20 | 113 | 16 | 3-(3'-Hydroxyphenyl)propanoic acid-4'-glucuronide |
| Cinnamic acid-3'-glucuronide (Coumaric acid-4-glucuronide) (CA-3'-Glc) | 4.64 | 339 | 90 | 163 | 20 | 113 | 16 | 3-(4'-Hydroxyphenyl)propanoic acid-3'-glucuronide |
| Cinnamic acid-4'-sulfate (Coumaric acid-4-sulfate) (CA-4'-S)           | 5.35 | 243 | 62 | 163 | 20 | 119 | 35 | 3-(4'-Hydroxyphenyl)propanoic acid-3'-sulfate     |
| Cinnamic acid-3'-sulfate (Coumaric acid-3-sulfate) (CA-3'-S)           | 5.74 | 243 | 62 | 163 | 20 | 119 | 35 | 3-(4'-Hydroxyphenyl)propanoic acid-3'-sulfate     |

---

**Phenylpropanoic acids (PPAs)**

|                                                                                                        |      |     |    |     |    |          |       |                                                   |
|--------------------------------------------------------------------------------------------------------|------|-----|----|-----|----|----------|-------|---------------------------------------------------|
| 3-(3',4'-Dihydroxyphenyl)propanoic acid (Dihydrocaffeic acid) (3',4'-diHPPA)                           | 3.10 | 181 | 64 | 137 | 14 | 119, 121 | 13,10 | 3-(3',4'-Dihydroxyphenyl)propanoic acid           |
| 3-(3'-Hydroxyphenyl)propanoic acid-4'-glucuronide (Dihydrocaffeic acid-4-glucuronide) (3'-HPPA-4'-Glc) | 3.11 | 357 | 63 | 181 | 21 | 113      | 22    | 3-(4'-Hydroxyphenyl)propanoic acid-3'-glucuronide |
| 3-(4'-Hydroxyphenyl)propanoic acid-3'-glucuronide (Dihydrocaffeic acid-3-glucuronide) (4'-HPPA-3'-Glc) | 3.96 | 357 | 63 | 181 | 21 | 113      | 22    | 3-(4'-Hydroxyphenyl)propanoic acid-3'-glucuronide |
| 3-(3'-Hydroxyphenyl)propanoic acid-4'-sulfate (Dihydrocaffeic acid-4-sulfate) (3'-HPPA-4'-S)           | 4.80 | 261 | 96 | 181 | 20 | 137      | 25    | 3-(4'-Hydroxyphenyl)propanoic acid-3'-sulfate     |

|                                                                                                                  |      |     |    |     |    |     |    |                                                    |
|------------------------------------------------------------------------------------------------------------------|------|-----|----|-----|----|-----|----|----------------------------------------------------|
| 3-(4'-Hydroxyphenyl)propanoic acid-3'-sulfate<br>(Dihydrocaffeic acid-3-sulfate) (4'-HPPA-3'-S)                  | 5.22 | 261 | 96 | 181 | 20 | 137 | 25 | 3-(4'-Hydroxyphenyl)propanoic acid-3'-sulfate      |
| 3-(4'-Hydroxy-3'-methoxyphenyl)propanoic acid<br>(Dihydroferulic acid) (3'-MeO-4'-HPPA)                          | 4.56 | 195 | 73 | 136 | 21 | 151 | 22 | 3-(4'-Hydroxy-3'-methoxyphenyl)propanoic acid      |
| 3-(3'-Hydroxy-4'-methoxyphenyl)propanoic acid<br>(Dihydroisoferulic acid) (4'-MeO-3'-HPPA)                       | 4.99 | 195 | 73 | 136 | 21 | 151 | 22 | 3-(4'-Hydroxy-3'-methoxyphenyl)propanoic acid      |
| 3-(3'-Methoxy-phenyl)propanoic acid-4'-glucuronide<br>(Dihydroferulic acid-4-glucuronide) (3'-MeO-PPA-4'-Glc)    | 4.08 | 371 | 90 | 195 | 26 | 113 | 21 | 3-(4'-Methoxy-phenyl)propanoic acid-3'-glucuronide |
| 3-(4'-Methoxy-phenyl)propanoic acid-3'-glucuronide<br>(Dihydroisoferulic acid-3-glucuronide) (4'-MeO-PPA-3'-Glc) | 4.48 | 371 | 90 | 195 | 26 | 113 | 21 | 3-(4'-Methoxy-phenyl)propanoic acid-3'-glucuronide |
| 3-(3'-Methoxy-phenyl)propanoic acid-4'-sulfate<br>(Dihydroferulic acid-4-sulfate) (3'-MeO-PPA-4'-S)              | 5.25 | 275 | 75 | 195 | 31 | 136 | 17 | 3-(3'-Methoxy-phenyl)propanoic acid-4'-sulfate     |
| 3-(4'-Methoxy-phenyl)propanoic acid-3'-sulfate<br>(Dihydroisoferulic acid-3-sulfate) (4'-MeO-PPA-3'-S)           | 5.55 | 275 | 75 | 195 | 31 | 136 | 17 | 3-(3'-Methoxy-phenyl)propanoic acid-4'-sulfate     |
| 3-(3'-Hydroxyphenyl)propanoic acid (3'-HPPA)                                                                     | 4.54 | 165 | 48 | 121 | 15 | 119 | 20 | 3-(3'-Hydroxyphenyl)propanoic acid                 |
| 3-(Phenyl)propanoic acid-4'-glucuronide (PPA-4'-Glc)                                                             | 4.13 | 341 | 90 | 165 | 20 | 113 | 18 | 3-(4'-Hydroxyphenyl)propanoic acid-3'-glucuronide  |

|                                                                                                             |      |     |    |     |    |                    |             |                                                   |
|-------------------------------------------------------------------------------------------------------------|------|-----|----|-----|----|--------------------|-------------|---------------------------------------------------|
| 3-(Phenyl)propanoic acid-3'-glucuronide (PPA-3'-Glc)                                                        | 4.44 | 341 | 90 | 165 | 20 | 113                | 18          | 3-(4'-Hydroxyphenyl)propanoic acid-3'-glucuronide |
| 3-(Phenyl)propanoic acid-sulfate (PPA-S)                                                                    | 5.46 | 245 | 90 | 165 | 20 | 121                | 15          | 3-(4'-Hydroxyphenyl)propanoic acid-3'-sulfate     |
| <b>Phenylhydracrylic acids (PHAs)</b>                                                                       |      |     |    |     |    |                    |             |                                                   |
| 3-Hydroxy-3-(phenyl)propanoic acid (Phenylhydracrylic acid) (3-OH-PPA)                                      | 4.45 | 165 | 48 | 119 | 20 | 121, 103           | 15, 14      | 3-(3'-Hydroxyphenyl)propanoic acid                |
| 3-Methoxy-3-phenylpropanoic acid-glucuronide (3-Methylphenylhydracrylic acid-glucuronide) (3-MeO-PPA-GlcUA) | 4.70 | 371 | 90 | 195 | 26 | 113                | 21          |                                                   |
| 3-Methoxy-3-phenylpropanoic acid-sulfate (3-Methylphenylhydracrylic acid-sulfate) (3-MeO-PPA-S)             | 6.00 | 275 | 86 | 195 | 31 | 136                | 17          |                                                   |
| <b>Phenylacetic acids (PAAs)</b>                                                                            |      |     |    |     |    |                    |             |                                                   |
| 3',4'-Dihydroxyphenylacetic acid (Homoprotocatechuic acid) (3',4'-DiHPAA)                                   | -    | 167 | 60 | 123 | 17 |                    |             |                                                   |
| 4'-Hydroxy-3'-methoxy-phenylacetic acid (Homovanillic acid) (3'-MeO-4'-HPAA)                                | 3.93 | 181 | 64 | 137 | 14 | 121, 122, 119, 166 | 10,30,13,30 | 4'-Hydroxy-3'-methoxy-phenylacetic acid           |
| 3'-Hydroxy-4'-methoxy-phenylacetic acid (Isohomovanillic acid) (4'-MeO-3'-HPAA)                             | 4.10 | 181 | 64 | 137 | 14 | 121, 122, 119, 166 | 10,30,13,30 | 4'-Hydroxy-3'-methoxy-phenylacetic acid           |
| 3'-Methoxy-phenylacetic acid-4'-glucuronide (Homovanillic acid-glucuronide) (3'-Met-PAA-4'-Glc)             | 4.30 | 261 | 96 | 137 | 25 | 181                | 20          | 3-Methoxybenzoic acid-4-glucuronide               |

|                                                                                                       |      |     |    |     |    |               |          |                                        |
|-------------------------------------------------------------------------------------------------------|------|-----|----|-----|----|---------------|----------|----------------------------------------|
| 4'-Methoxy-phenylacetic acid-3'-glucuronide<br>(Isohomovanillic acid-glucuronide) (4'-Met-PAA-3'-Glc) | 4.60 | 261 | 96 | 137 | 25 | 181           | 20       | 4-Methoxybenzoic acid-3-glucuronide    |
| 3'-Methoxy-phenylacetic acid-4'-sulfate<br>(Homovanillic acid-sulfate) (3'-Met-PAA-4'-S)              | 4.80 | 261 | 96 | 137 | 25 | 181           | 20       | 3-Methoxybenzoic acid-4-sulfate        |
| 4'-Methoxy-phenylacetic acid-3'-sulfate<br>(Isohomovanillic acid-sulfate) (4'-Met-PAA-3'-S)           | 5.20 | 261 | 96 | 137 | 25 | 181           | 20       | 4-Methoxybenzoic acid-3-sulfate        |
| 3'-Hydroxyphenylacetic acid (3'-HPAA)                                                                 | 3.60 | 151 | 40 | 107 | 10 |               |          | 3'-Hydroxyphenylacetic acid            |
| 4'-Hydroxyphenylacetic acid (4'-HPAA)                                                                 | 2.90 | 151 | 40 | 107 | 10 |               |          | 4'-Hydroxyphenylacetic acid            |
| <b>Benzoic acids (BAs)</b>                                                                            |      |     |    |     |    |               |          |                                        |
| 3,4-Dihydroxybenzoic acid (Protocatechuic acid)<br>(3,4-DiHBA)                                        | 1.53 | 153 | 64 | 109 | 20 | 108           | 27       | 3,4-Dihydroxybenzoic acid              |
| 3-Hydroxybenzoic acid-4-glucuronide<br>(Protocatechuic acid-4-glucuronide) (3-HBA-4-Glc)              | -    | 329 | 81 | 153 | 21 | 113           | 18       |                                        |
| 4-Hydroxybenzoic acid-3-glucuronide<br>(Protocatechuic acid-3-glucuronide) (4-HBA-3-Glc)              | -    | 329 | 81 | 153 | 21 | 113           | 18       |                                        |
| Hydroxybenzoic acid-sulfate (Protocatechuic acid-sulfate) (HBA-S)                                     | 4.45 | 233 | 85 | 153 | 20 | 109           | 33       | 3-Hydroxybenzoic acid-4-sulfate        |
| 4-Hydroxy-3-methoxybenzoic acid (Vanillic acid)<br>(3-MeO-4-HBA)                                      | 3.65 | 167 | 60 | 152 | 18 | 123, 108, 121 | 17,21,18 | 4'-Hydroxy-3'-methoxyphenylacetic acid |
| 3-Methoxybenzoic acid-4-glucuronide (Vanillic acid-4-glucuronide) (3-MeO-BA-4-Glc)                    | 1.79 | 343 | 92 | 167 | 23 | 152, 113      | 40,17    | 3-Methoxybenzoic acid-4-glucuronide    |
| 4-Methoxybenzoic acid-3-glucuronide (Isovanillic acid-3-glucuronide) (4-MeO-BA-3-Glc)                 | -    | 343 | 92 | 113 | 17 | 167, 152      | 23,40    |                                        |

acid-3-glucuronide) (4-MeO-BA-3-Glc)

|                                                                             |      |     |    |     |    |          |       |                                 |
|-----------------------------------------------------------------------------|------|-----|----|-----|----|----------|-------|---------------------------------|
| 3-Methoxybenzoic acid-4-sulfate (Vanillic acid-4-sulfate) (3-MeO-BA-4-S)    | 4.67 | 247 | 72 | 167 | 17 | 152, 123 | 27,17 | 3-Methoxybenzoic acid-4-sulfate |
| 4-Methoxybenzoic acid-3-sulfate (Isovanillic acid-3-sulfate) (4-MeO-BA-3-S) | 4.90 | 247 | 72 | 167 | 17 | 152      | 27    | 4-Methoxybenzoic acid-3-sulfate |
| 3-Hydroxybenzoic acid (3-HBA)                                               | 3.50 | 137 | 70 | 93  | 16 | 92       | 26    | 4-Hydroxybenzoic acid           |
| 4-Hydroxybenzoic acid (4-HBA)                                               | 2.60 | 137 | 70 | 93  | 16 | 92       | 26    | 4-Hydroxybenzoic acid           |
| Benzoic acid-4-glucuronide (BA-4-Glc)                                       | 1.26 | 313 | 78 | 113 | 15 | 137      | 20    | Benzoic acid-4-glucuronide      |
| Benzoic acid-3-glucuronide (BA-3-Glc)                                       | 1.82 | 313 | 78 | 113 | 15 | 137      | 20    | Benzoic acid-4-glucuronide      |
| Benzoic acid-4-sulfate (BA-4-S)                                             | 4.50 | 217 | 70 | 137 | 20 | 93       | 16    | Benzoic acid-4-sulfate          |
| Benzoic acid-3-sulfate (BA-3-S)                                             | 4.95 | 217 | 70 | 137 | 20 | 93       | 16    | Benzoic acid-4-sulfate          |

#### Hippuric acids (HAs)

|                                |      |     |    |     |    |      |    |                        |
|--------------------------------|------|-----|----|-----|----|------|----|------------------------|
| 4-Hydroxyhippuric acid (4-HHA) | 1.65 | 194 | 72 | 100 | 11 | 150  | 15 | 4-Hydroxyhippuric acid |
| Hippuric acid (HA)             | 3.50 | 178 | 61 | 134 | 15 | 77.2 | 22 | Hippuric acid          |

#### Benzaldehydes (BALs)

|                                |      |     |    |    |    |    |    |                       |
|--------------------------------|------|-----|----|----|----|----|----|-----------------------|
| 4-Hydroxybenzaldehyde (4-HBAL) | 3.55 | 121 | 89 | 92 | 27 | 91 | 22 | 4-Hydroxybenzaldehyde |
|--------------------------------|------|-----|----|----|----|----|----|-----------------------|

#### Benzene derivatives (BZs)

|                                                                              |      |     |    |     |    |     |    |                          |
|------------------------------------------------------------------------------|------|-----|----|-----|----|-----|----|--------------------------|
| 3,5-Dihydroxybenzene-1-glucuronide (Phloroglucinol-glucuronide) (Phlglu-Glc) | -    | 301 | 87 | 125 | 27 | 113 | 15 |                          |
| 3,5-Dihydroxybenzene-1-sulfate (Phloroglucinol-sulfate) (Phlglu-S)           | -    | 205 | 83 | 125 | 20 | 97  | 15 |                          |
| 5-Hydroxy-3-methoxybenzene-1-sulfate                                         | 5.53 | 219 | 68 | 139 | 20 | 124 | 24 | 3-Methoxybenzoic acid-4- |

|                                                                                                      |      |     |    |     |    |     |    |  |                                 |
|------------------------------------------------------------------------------------------------------|------|-----|----|-----|----|-----|----|--|---------------------------------|
| (Methoxyphloroglucinol-sulfate) (MeO-Phlglu-S)                                                       |      |     |    |     |    |     |    |  | sulfate                         |
| 2-Hydroxy-benzene-1-glucuronide (Catechol-glucuronide) (Cat-Glc)                                     | 2.84 | 285 | 88 | 109 | 27 | 113 | 15 |  | Benzoic acid-4-glucuronide      |
| 2-Hydroxy-benzene-1-sulfate (Catechol-sulfate) (Cat-S)                                               | 4.93 | 189 | 70 | 109 | 20 | 81  | 20 |  | Benzoic acid-4-sulfate          |
| 2-Hydroxy-4/5-methylbenzene-1-sulfate isomer 2 (4-Methylcatechol-sulfate isomer 1) (4-Me-Cat-S_iso1) | 5.40 | 203 | 70 | 108 | 26 | 123 | 20 |  | 3-Methoxybenzoic acid-4-sulfate |
| 2-Hydroxy-4/5-methylbenzene-1-sulfate isomer 2 (4-Methylcatechol-sulfate isomer 2) (4-Me-Cat-S_iso2) | 5.96 | 203 | 70 | 108 | 26 | 123 | 20 |  | 3-Methoxybenzoic acid-4-sulfate |

---

## Supplementary Results

**ESI Table S2:** Mean daily intake of energy and nutrients for total population and by intervention groups.

|                                     | Total<br>n=44     |                   | Intervention<br>n=24 |                   | Control<br>n=20   |                   | P<br>Group   | P Time       | P<br>Interact<br>ion |
|-------------------------------------|-------------------|-------------------|----------------------|-------------------|-------------------|-------------------|--------------|--------------|----------------------|
|                                     | T1                | T2                | T1                   | T2                | T1                | T2                |              |              |                      |
| Energy (kJ/day)                     | 7560.06 ± 1563.87 | 7127.97 ± 1871.53 | 7261.14 ± 1206.40    | 6689.00 ± 1643.01 | 7918.75 ± 1877.48 | 7654.74 ± 2030.69 | 0.081        | 0.085        | 0.519                |
| Energy (kcal/day)                   | 1799.48 ± 372.06  | 1696.14 ± 446.07  | 1729.13 ± 287.72     | 1591.35 ± 391.28  | 1883.89 ± 446.45  | 1821.89 ± 484.23  | 0.083        | 0.084        | 0.505                |
| Protein (g/day)                     | 68.94 ± 15.24     | 66.14 ± 16.45     | 64.14 ± 13.85        | 60.83 ± 15.00     | 74.69 ± 15.15     | 72.52 ± 16.19     | <b>0.007</b> | 0.252        | 0.809                |
| (%E)                                | 15                | 16                | 15                   | 15                | 16                | 16                |              |              |                      |
| Lipids (g/day)                      | 68.82 ± 17.44     | 62.51 ± 19.96     | 69.18 ± 19.06        | 56.76 ± 17.51     | 68.38 ± 15.75     | 69.42 ± 20.94     | 0.230        | <b>0.041</b> | <b>0.017</b>         |
| (%E)                                | 34                | 33                | 36                   | 32                | 33                | 34                |              |              |                      |
| Saturated fatty acids (g/day)       | 22.09 ± 5.85      | 21.22 ± 8.49      | 21.48 ± 5.83         | 18.83 ± 6.24      | 22.83 ± 5.93      | 24.09 ± 10.00     | 0.078        | 0.543        | 0.091                |
| (%E)                                | 11                | 11                | 11                   | 11                | 11                | 12                |              |              |                      |
| Monounsaturated fatty acids (g/day) | 31.23 ± 9.42      | 27.22 ± 8.47      | 32.15 ± 11.10        | 24.79 ± 8.09      | 30.12 ± 7.02      | 30.14 ± 8.16      | 0.470        | <b>0.012</b> | <b>0.011</b>         |
| (%E)                                | 16                | 14                | 17                   | 14                | 15                | 15                |              |              |                      |
| Polyunsaturated fatty acids (g/day) | 9.81 ± 2.64       | 8.78 ± 3.37       | 9.65 ± 2.34          | 8.09 ± 3.54       | 10.01 ± 3.01      | 9.61 ± 3.02       | 0.254        | <b>0.024</b> | 0.171                |
| (%E)                                | 5                 | 5                 | 5                    | 5                 | 5                 | 5                 |              |              |                      |
| Cholesterol (mg/day)                | 244.62 ± 80.43    | 224.92 ± 87.23    | 226.59 ± 72.19       | 198.84 ± 66.93    | 266.25 ± 86.19    | 256.22 ± 99.54    | <b>0.021</b> | 0.179        | 0.525                |
| Carbohydrates (g/day)               | 210.46 ± 57.97    | 202.67 ± 56.47    | 197.66 ± 43.82       | 196.33 ± 54.08    | 225.81 ± 69.48    | 210.27 ± 59.72    | 0.163        | 0.339        | 0.419                |
| (%E)                                | 47                | 48                | 46                   | 50                | 48                | 46                |              |              |                      |
| Sugars (g/day)                      | 67.62 ± 23.39     | 72.44 ± 25.29     | 65.99 ± 24.98        | 76.70 ± 28.24     | 69.58 ± 21.80     | 67.34 ± 20.78     | 0.653        | 0.263        | 0.090                |
| (%E)                                | 15                | 17                | 15                   | 20                | 15                | 15                |              |              |                      |

|                              |               |               |               |              |               |               |              |              |       |
|------------------------------|---------------|---------------|---------------|--------------|---------------|---------------|--------------|--------------|-------|
| <b>Dietary fibre (g/day)</b> | 19.07 ± 5.60  | 16.84 ± 5.72  | 17.64 ± 4.09  | 15.39 ± 5.25 | 20.79 ± 6.71  | 18.58 ± 5.90  | <b>0.044</b> | <b>0.002</b> | 0.978 |
| <b>Alcohol (g/day)</b>       | 11.10 ± 14.41 | 10.78 ± 13.65 | 10.60 ± 10.23 | 9.98 ± 11.14 | 11.71 ± 18.51 | 11.75 ± 16.43 | 0.733        | 0.759        | 0.730 |
| <b>(%E)</b>                  | 4             | 4             | 4             | 4            | 4             | 4             |              |              |       |

*Data are reported as mean ± standard deviation and percentage of the main nutrients at baseline (T1) and at 12-weeks (T2) and p values from generalized linear model (GLM) for repeated measures.*



**ESI Table S3.** Total urinary excretion ( $\mu\text{mol}$ ) of phenolic metabolites in control and bergamot groups during the 24 h after the first intervention day (T1) and the 24 h after the last intervention day (T2). Data are indicated as mean  $\pm$  SEM. Nomenclature of metabolites is reported as proposed by Kay et al (30)

| Urinary metabolites                                                                 | Control group ( $\mu\text{mol}$ ) |                  | Intervention group ( $\mu\text{mol}$ ) |                  |
|-------------------------------------------------------------------------------------|-----------------------------------|------------------|----------------------------------------|------------------|
|                                                                                     | T1                                | T2               | T1                                     | T2               |
| <b>Structurally-related flavanone metabolites (Flavanones)</b>                      |                                   |                  |                                        |                  |
| Naringenin-7-glucuronide (Nar-7-Glc)                                                | 0.45 $\pm$ 0.14                   | 0.25 $\pm$ 0.09  | 1.23 $\pm$ 0.23                        | 1.44 $\pm$ 0.43  |
| Naringenin-4'-glucuronide (Nar-4'-Glc)                                              | 2.05 $\pm$ 0.64                   | 1.17 $\pm$ 0.34  | 7.69 $\pm$ 1.92                        | 8.22 $\pm$ 2.54  |
| Naringenin-sulfate (Nar-S)                                                          | 0.13 $\pm$ 0.07                   | 0.21 $\pm$ 0.09  | 0.25 $\pm$ 0.08                        | 0.17 $\pm$ 0.04  |
| Naringenin-diglucuronide (Nar-diGlc)                                                | 0.03 $\pm$ 0.01                   | 0.03 $\pm$ 0.02  | 0.10 $\pm$ 0.02                        | 0.14 $\pm$ 0.04  |
| Naringenin-sulfate-glucuronide (Nar-S-Glc)                                          | 0.04 $\pm$ 0.03                   | 0.07 $\pm$ 0.04  | 0.54 $\pm$ 0.14                        | 1.68 $\pm$ 0.33  |
| Isosakuranetin (Isok)                                                               | -                                 | 0.001 $\pm$ 0.00 | 0.04 $\pm$ 0.00                        | 0.04 $\pm$ 0.01  |
| Hesperetin (Hes)                                                                    | -                                 | -                | 0.01 $\pm$ 0.00                        | 0.01 $\pm$ 0.00  |
| Hesperetin-7-glucuronide (Hes-7-Glc)                                                | 0.14 $\pm$ 0.07                   | 0.03 $\pm$ 0.01  | 0.75 $\pm$ 0.16                        | 1.10 $\pm$ 0.44  |
| Hesperetin-3'-glucuronide (Hes-3'-Glc)                                              | 2.91 $\pm$ 1.45                   | 1.21 $\pm$ 0.54  | 6.95 $\pm$ 1.57                        | 10.41 $\pm$ 3.82 |
| Hesperetin-sulfate (Hes-S)                                                          | 1.30 $\pm$ 0.61                   | 0.49 $\pm$ 0.26  | 4.92 $\pm$ 1.04                        | 7.82 $\pm$ 2.48  |
| Hesperetin-diglucuronide (Hes-diGlc)                                                | 0.09 $\pm$ 0.04                   | 0.05 $\pm$ 0.03  | 0.50 $\pm$ 0.15                        | 0.69 $\pm$ 0.21  |
| Hesperetin-sulfate-glucuronide (Hes-S-Glc)                                          | 0.07 $\pm$ 0.02                   | 0.08 $\pm$ 0.02  | 0.04 $\pm$ 0.01                        | 0.04 $\pm$ 0.01  |
| <b>Structurally-related flavone metabolites (Flavones)</b>                          |                                   |                  |                                        |                  |
| Apigenin-glucuronide (Api-Glc)                                                      | 0.13 $\pm$ 0.02                   | 0.21 $\pm$ 0.06  | 0.35 $\pm$ 0.13                        | 0.28 $\pm$ 0.08  |
| Diosmetin (Dios)                                                                    | -                                 | 0.02 $\pm$ 0.01  | 0.07 $\pm$ 0.02                        | 0.09 $\pm$ 0.03  |
| Diosmetin-glucuronide (Dios-Glc)                                                    | 0.23 $\pm$ 0.08                   | 0.22 $\pm$ 0.07  | 0.52 $\pm$ 0.10                        | 0.53 $\pm$ 0.14  |
| <b>Cinnamic acids (CAs)</b>                                                         |                                   |                  |                                        |                  |
| 3',4'-Dihydroxycinnamic acid (Caffeic acid) (3',4'-diHCA)                           | 0.06 $\pm$ 0.01                   | 0.07 $\pm$ 0.03  | 0.06 $\pm$ 0.02                        | 0.06 $\pm$ 0.02  |
| 3'-Hydroxycinnamic acid-4'-glucuronide (Caffeic acid-4-glucuronide) (3'-HCA-4'-Glc) | 0.03 $\pm$ 0.02                   | 0.02 $\pm$ 0.01  | 0.05 $\pm$ 0.02                        | 0.04 $\pm$ 0.02  |
| 4'-Hydroxycinnamic acid-3'-glucuronide (Caffeic acid-3-glucuronide) (4'-HCA-3'-Glc) | 0.07 $\pm$ 0.02                   | 0.06 $\pm$ 0.03  | 0.07 $\pm$ 0.01                        | 0.05 $\pm$ 0.01  |
| 3'-Hydroxycinnamic acid-4'-sulfate (Caffeic acid-3-sulfate) (3'-HCA-4'-S)           | 0.20 $\pm$ 0.05                   | 0.30 $\pm$ 0.07  | 0.30 $\pm$ 0.06                        | 0.24 $\pm$ 0.06  |
| 4'-Hydroxycinnamic acid-3'-sulfate (Caffeic acid-4-sulfate) (4'-HCA-3'-S)           | 1.39 $\pm$ 0.26                   | 1.40 $\pm$ 0.23  | 1.35 $\pm$ 0.18                        | 1.16 $\pm$ 0.18  |

|                                                                                                        |           |           |           |           |
|--------------------------------------------------------------------------------------------------------|-----------|-----------|-----------|-----------|
| 4'-Hydroxy-3'-methoxycinnamic acid (Ferulic acid) (3'-MeO-4'-HCA)                                      | 0.06±0.01 | 0.20±0.09 | 0.06±0.01 | 0.13±0.05 |
| 3'-Methoxycinnamic acid-4'-glucuronide (Ferulic acid-4-glucuronide) (3'-MeO-CA-4'-Glc)                 | 3.90±0.95 | 2.92±0.42 | 3.83±0.65 | 3.19±0.59 |
| 4'-Methoxycinnamic acid-3'-glucuronide (Isoferulic acid-3-glucuronide) (4'-MeO-CA-3'-Glc)              | 0.98±0.18 | 0.84±0.15 | 1.07±0.17 | 1.00±0.16 |
| 3'-Methoxycinnamic acid-4'-sulfate (Ferulic acid-4-sulfate) (3'-MeO-CA-4'-S)                           | 2.64±0.51 | 3.00±0.44 | 2.34±0.29 | 2.06±0.24 |
| 4'-Methoxycinnamic acid-3'-sulfate (Isoferulic acid-3-sulfate) (4'-MeO-CA-3'-S)                        | 0.10±0.02 | 0.11±0.02 | 0.10±0.02 | 0.14±0.04 |
| Feruloylglycine (Fer-Gly)                                                                              | 2.69±0.49 | 2.50±0.39 | 2.81±0.68 | 2.47±0.37 |
| 2'-Hydroxycinnamic acid ( <i>o</i> -Coumaric acid) (2'-HCA)                                            | 0.01±0.00 | -         | 0.01±0.00 | 0.01±0.00 |
| 3'-Hydroxycinnamic acid ( <i>m</i> -Coumaric acid) (3'-HCA)                                            | 0.06±0.03 | 0.08±0.02 | 0.07±0.02 | 0.09±0.02 |
| 4'-Hydroxycinnamic acid ( <i>p</i> -Coumaric acid) (4'-HCA)                                            | 0.17±0.08 | 0.20±0.04 | 0.25±0.05 | 0.15±0.01 |
| Cinnamic acid-4'-glucuronide (Coumaric acid-4-glucuronide) (CA-4'-Glc)                                 | 0.09±0.03 | 0.05±0.02 | 0.06±0.02 | 0.03±0.01 |
| Cinnamic acid-3'-glucuronide (Coumaric acid-3-glucuronide) (CA-3'-Glc)                                 | 0.04±0.01 | 0.04±0.02 | 0.06±0.01 | 0.07±0.02 |
| Cinnamic acid-4'-sulfate (Coumaric acid-4-sulfate) (CA-4'-S)                                           | 0.31±0.06 | 0.29±0.04 | 0.27±0.04 | 0.24±0.04 |
| Cinnamic acid-3'-sulfate (Coumaric acid-3-sulfate) (CA-3'-S)                                           | 0.42±0.16 | 0.37±0.06 | 0.36±0.04 | 0.52±0.09 |
| <b>Phenylpropanoic acids (PPAs)</b>                                                                    |           |           |           |           |
| 3-(3',4'-Dihydroxyphenyl)propanoic acid (Dihydrocaffeic acid) (3',4'-diHPPA)                           | 0.56±0.14 | 0.50±0.14 | 2.44±0.39 | 3.13±0.52 |
| 3-(3'-Hydroxyphenyl)propanoic acid-4'-glucuronide (Dihydrocaffeic acid-4-glucuronide) (3'-HPPA-4'-Glc) | 0.06±0.04 | 0.02±0.02 | 0.03±0.03 | 0.06±0.05 |
| 3-(4'-Hydroxyphenyl)propanoic acid-3'-glucuronide (Dihydrocaffeic acid-3-glucuronide) (4'-HPPA-3'-Glc) | 0.13±0.06 | 0.01±0.01 | 0.12±0.06 | 0.04±0.02 |
| 3-(3'-Hydroxyphenyl)propanoic acid-4'-sulfate (Dihydrocaffeic acid-4-sulfate) (3'-HPPA-4'-S)           | 0.30±0.05 | 0.35±0.03 | 0.24±0.03 | 0.25±0.04 |
| 3-(4'-Hydroxyphenyl)propanoic acid-3'-sulfate (Dihydrocaffeic acid-3-sulfate) (4'-HPPA-3'-S)           | 2.55±0.69 | 1.99±0.35 | 2.33±0.75 | 2.21±0.44 |
| 3-(4'-Hydroxy-3'-methoxyphenyl)propanoic acid (Dihydroferulic acid) (3'-MeO-4'-HPPA)                   | 0.79±0.27 | 0.90±0.25 | 0.77±0.17 | 1.01±0.35 |
| 3-(3'-Hydroxy-4'-methoxyphenyl)propanoic acid (Dihydroisoferulic acid) (4'-MeO-3'-                     | 0.01±0.01 | 0.29±0.23 | 1.16±0.22 | 1.45±0.31 |

HPPA)

|                                                                                                               |           |           |           |           |
|---------------------------------------------------------------------------------------------------------------|-----------|-----------|-----------|-----------|
| 3-(3'-Methoxy-phenyl)propanoic acid-4'-glucuronide (Dihydroferulic acid-4-glucuronide) (3'-MeO-PPA-4'-Glc)    | 0.53±0.13 | 0.41±0.08 | 0.54±0.15 | 0.52±0.13 |
| 3-(4'-Methoxy-phenyl)propanoic acid-3'-glucuronide (Dihydroisoferulic acid-3-glucuronide) (4'-MeO-PPA-3'-Glc) | 0.55±0.11 | 0.35±0.08 | 0.97±0.16 | 1.03±0.19 |
| 3-(3'-Methoxy-phenyl)propanoic acid-4'-sulfate (Dihydroferulic acid-4-sulfate) (3'-MeO-PPA-4'-S)              | 0.51±0.12 | 0.48±0.10 | 0.43±0.10 | 0.47±0.08 |
| 3-(4'-Methoxy-phenyl)propanoic acid-3'-sulfate (Dihydroisoferulic acid-3-sulfate) (4'-MeO-PPA-3'-S)           | 0.22±0.05 | 0.16±0.03 | 0.32±0.05 | 0.32±0.05 |
| 3-(3'-Hydroxyphenyl)propanoic acid (3'-HPPA)                                                                  | 0.39±0.15 | 0.54±0.16 | 0.58±0.14 | 0.84±0.25 |
| 3-(Phenyl)propanoic acid-4'-glucuronide (PPA-4'-Glc)                                                          | 0.24±0.09 | 0.16±0.03 | 0.21±0.05 | 0.29±0.09 |
| 3-(Phenyl)propanoic acid-3'-glucuronide (PPA-3'-Glc)                                                          | 0.11±0.04 | 0.08±0.01 | 0.08±0.01 | 0.15±0.05 |
| 3-(Phenyl)propanoic acid-sulfate (PPA-S)                                                                      | 1.21±0.35 | 1.50±0.22 | 1.28±0.19 | 1.78±0.35 |

#### Phenylhydracrylic acids (PHAs)

|                                                                                                             |           |           |           |           |
|-------------------------------------------------------------------------------------------------------------|-----------|-----------|-----------|-----------|
| 3-Hydroxy-3-(phenyl)propanoic acid (Phenylhydracrylic acid) (3-OH-PPA)                                      | 0.05±0.01 | 0.06±0.01 | 0.05±0.01 | 0.05±0.01 |
| 3-Methoxy-3-phenylpropanoic acid-glucuronide (3-Methylphenylhydracrylic acid-glucuronide) (3-MeO-PPA-GlcUA) | 0.09±0.03 | 0.15±0.05 | 1.17±0.14 | 1.29±0.21 |
| 3-Methoxy-3-phenylpropanoic acid-sulfate (3-Methylphenylhydracrylic acid-sulfate) (3-MeO-PPA-S)             | 0.02±0.02 | 0.05±0.02 | 0.27±0.03 | 0.36±0.06 |

#### Phenylacetic acids (PAAs)

|                                                                                                    |           |           |           |           |
|----------------------------------------------------------------------------------------------------|-----------|-----------|-----------|-----------|
| 4'-Hydroxy-3'-methoxy-phenylacetic acid (Homovanillic acid) (3'-MeO-4'-HPAA)                       | 4.72±0.65 | 5.60±0.75 | 3.99±0.49 | 3.76±0.38 |
| 3'-Hydroxy-4'-methoxy-phenylacetic acid (Isohomovanillic acid) (4'-MeO-3'-HPAA)                    | 3.23±0.66 | 2.58±0.69 | 2.57±0.50 | 3.51±0.94 |
| 3'-Methoxy-phenylacetic acid-4'-glucuronide (Homovanillic acid-glucuronide) (3'-Met-PAA-4'-Glc)    | 0.65±0.09 | 0.96±0.21 | 0.73±0.10 | 0.89±0.14 |
| 4'-Methoxy-phenylacetic acid-3'-glucuronide (Isohomovanillic acid-glucuronide) (4'-Met-PAA-3'-Glc) | 0.04±0.01 | 0.16±0.10 | 0.17±0.02 | 0.14±0.02 |
| 3'-Methoxy-phenylacetic acid-4'-sulfate (Homovanillic acid-sulfate) (3'-Met-PAA-4'-S)              | 0.70±0.13 | 0.76±0.09 | 0.55±0.06 | 0.54±0.07 |
| 4'-Methoxy-phenylacetic acid-3'-sulfate (Isohomovanillic acid-sulfate) (4'-Met-PAA-3'-S)           | 3.33±0.92 | 2.54±0.45 | 3.02±0.99 | 2.80±0.56 |

S)

|                                       |           |           |           |           |
|---------------------------------------|-----------|-----------|-----------|-----------|
| 3'-Hydroxyphenylacetic acid (3'-HPAA) | 3.02±0.50 | 3.66±0.54 | 4.64±0.77 | 4.16±0.63 |
| 4'-Hydroxyphenylacetic acid (4'-HPAA) | 3.46±0.80 | 3.02±0.52 | 2.88±0.50 | 2.86±0.48 |

#### Benzoic acids (BAs)

|                                                                                    |           |           |           |           |
|------------------------------------------------------------------------------------|-----------|-----------|-----------|-----------|
| 3,4-Dihydroxybenzoic acid (Protocatechuic acid) (3,4-DiHBA)                        | 0.29±0.06 | 0.47±0.07 | 0.43±0.09 | 0.35±0.05 |
| Hydroxybenzoic acid-sulfate (Protocatechuic acid-sulfate) (HBA-S)                  | 0.58±0.20 | 0.46±0.06 | 0.56±0.10 | 0.55±0.10 |
| 4-Hydroxy-3-methoxybenzoic acid (Vanillic acid) (3-MeO-4-HBA)                      | 2.66±1.22 | 6.88±2.74 | 2.94±0.87 | 2.51±0.89 |
| 3-Methoxybenzoic acid-4-glucuronide (Vanillic acid-4-glucuronide) (3-MeO-BA-4-Glc) | 0.68±0.12 | 1.23±0.65 | 0.78±0.17 | 0.73±0.21 |
| 3-Methoxybenzoic acid-4-sulfate (Vanillic acid-4-sulfate) (3-MeO-BA-4-S)           | 2.45±0.58 | 4.44±1.89 | 1.98±0.35 | 1.98±0.45 |
| 4-Methoxybenzoic acid-3-sulfate (Isovanillic acid-3-sulfate) (4-MeO-BA-3-S)        | 0.11±0.01 | 0.11±0.02 | 0.16±0.03 | 0.14±0.02 |
| 3-Hydroxybenzoic acid (3-HBA)                                                      | 2.32±1.96 | 0.51±0.39 | 0.48±0.32 | 0.12±0.07 |
| 4-Hydroxybenzoic acid (4-HBA)                                                      | 3.94±1.80 | 2.76±0.55 | 3.41±1.03 | 2.47±0.07 |
| Benzoic acid-4-glucuronide (BA-4-Glc)                                              | 0.02±0.01 | 0.01±0.00 | 0.02±0.01 | 0.02±0.01 |
| Benzoic acid-3-glucuronide (BA-3-Glc)                                              | 0.08±0.02 | 0.06±0.02 | 0.12±0.04 | 0.08±0.02 |
| Benzoic acid-4-sulfate (BA-4-S)                                                    | 5.20±1.31 | 4.54±1.12 | 3.78±0.62 | 3.23±0.42 |
| Benzoic acid-3-sulfate (BA-3-S)                                                    | 0.42±0.08 | 0.85±0.25 | 0.72±0.12 | 0.66±0.11 |

#### Hippuric acids (HAs)

|                        |              |              |              |              |
|------------------------|--------------|--------------|--------------|--------------|
| 4-Hydroxyhippuric acid | 6.63±1.16    | 7.19±1.06    | 6.52±0.50    | 9.09±1.72    |
| Hippuric acid          | 144.55±32.51 | 186.94±32.80 | 162.34±23.85 | 149.48±21.27 |

#### Benzaldehydes (BALs)

|                       |           |           |           |           |
|-----------------------|-----------|-----------|-----------|-----------|
| 4-Hydroxybenzaldehyde | 0.14±0.04 | 0.14±0.04 | 0.15±0.03 | 0.13±0.02 |
|-----------------------|-----------|-----------|-----------|-----------|

#### Benzenes (BZs)

|                                                                                     |            |            |            |            |
|-------------------------------------------------------------------------------------|------------|------------|------------|------------|
| 5-Hydroxy-3-methoxybenzene-1-sulfate (Methoxyphloroglucinol-sulfate) (MeO-Phlglu-S) | 0.84±0.14  | 1.14±0.22  | 0.80±0.11  | 0.74±0.16  |
| 2-Hydroxy-benzene-1-glucuronide (Catechol-glucuronide) (Cat-Glc)                    | 0.35±0.10  | 0.27±0.06  | 0.31±0.08  | 0.27±0.08  |
| 2-Hydroxy-benzene-1-sulfate (Catechol-sulfate) (Cat-S)                              | 18.06±3.54 | 22.91±3.53 | 15.64±2.37 | 15.27±2.17 |
| 2-Hydroxy-4/5-methylbenzene-1-sulfate isomer 2 (4-Methylcatechol-sulfate isomer 1)  | 1.26±0.23  | 1.67±0.32  | 0.95±0.16  | 0.94±0.17  |

(4-Me-Cat-S\_iso1)

2-Hydroxy-4/5-methylbenzene-1-sulfate

isomer 2 (4-Methylcatechol-sulfate isomer 2)

0.03±0.02

0.14±0.12

0.31±0.12

0.39±0.15

(4-Me-Cat-S\_iso2)

---

## **Principal Component Analysis (PCA) and Partial least squares discriminant analysis (PLS-DA)**

PCA was applied to further investigate the effect of BBB intervention and time on the urinary phenolic profile of the volunteers. Specifically, to analyze the effect of time, the acute effect of BBB consumption (detectable through T1 collection) was compared with the combined acute and chronic effect, (detectable through T2 collection). (Poly)phenolic classes grouping metabolites with the same aglycone moiety were considered as variables, to analyze possible differences arising from different catabolic pathways, and variables were autoscaled to give them equal weight, independently from the excretion level. Two PCs explained 45.7% of the total variability, with PC1 and PC2 explaining 32.3% and 13.4%, respectively (R2X parameter). The model predicted 26.5% of the total variability (Q2 parameter), with a major contribution from PC1 (23.5%). It was possible to identify a pattern of observation and variable distribution in the score and loading plots, respectively (ESI Figure 1A), which was in line with the intervention. Observations in the upper quadrants (positive values for PC2) belonged mainly to the BBB group and were characterized by a higher excretion of specific metabolites deriving from BBB (or other citrus fruits), namely structurally-related flavanones and flavones, and some phenylhydracrylic acids (hydroxy-3-(phenyl)propanoic acids). On the contrary, observations in the lower quadrants (negative values for PC2) belonged mainly to the control group and were characterized by a higher excretion of unspecific phenolic acids (mainly phenylacetic and benzoic acid derivatives) and benzene derivatives, which could derive from other sources of (poly)phenols present in the daily diet and from various endogenous and exogenous sources other than (poly)phenols (36). Observations were discriminated by PC1 according to the excreted amounts of metabolites, while PC2 discriminated them on a qualitative basis, resulting in the separation of metabolites specific of BBB from unspecific ones. No patterns depending on intervention time (T1 versus T2) were identified, but it was interesting to notice that all observations belonging to BBB group and characterized by the highest excretion of specific bergamot-derived metabolites were taken at T2 (observations 8, 14, 42 and 44). A PLS-DA (ESI Figure S1B) was applied to improve the

stratification of subjects into the two clusters (BBB group and control group), and to predict metabolites characterizing each group, using VIP scores (ESI Figure S2). The PLS-DA model passed cross-validation by CV-ANOVA ( $p=8.9e^{-12}$ ) and by random permutation test. The explained variance ( $R^2X$ ) was 41.7%, with a greater contribution of the second PLS-DA component (27.3%). The predictive ability was 52.8%, with a major contribution from the first PLS-DA component (48.6%), which contributed greatly also to the variation explained by the clusters ( $R^2Y=61.5\%$ ) (ESI Figure S1B). The ROC curves confirmed the good classification performance of the PLS-DA model (ESI Figure S3). The first component discriminated observations on a qualitative basis, with specific bergamot-derived metabolites in the right quadrants (positive value), stratifying subjects according to the intervention (BBB group in the right quadrants and control group in the left quadrants) (ESI Figure S1B). As suggested by PCA, the most relevant metabolites (VIP score  $> 1.25$ ) for the clustering belonged to the classes of structurally-related flavanone metabolites (isakuranetin, naringenin, and hesperetin derivatives), structurally-related flavone metabolites (diosmetin derivatives), and phenylhydracrylic acids (hydroxy-3-(phenyl)propanoic acids) (ESI Figure S2).

**ESI Figure S1.** (A) Score and loading plots resulting after applying PCA on autoscaled data for (poly)phenolic classes (including hippuric acids) and considering 2 PCs (PC1 and PC2). B\_T1 indicates excretion values in the bergamot group during the 24 hours after the first intervention day, B\_T2 indicates excretion values in the bergamot group during the 24 hours after the last intervention day, P\_T1 indicates excretion values in the control group during the 24 hours after the first intervention day, and P\_T2 indicates excretion values in the control group during the 24 hours after the last intervention day. (B) Score and loading plots resulting after applying PLS-DA with clusters based on the treatment type, namely bergamot-based beverage (BBB) group and control group. Data (excretion of (poly)phenolic classes) were autoscaled, and two components were considered. The abbreviations used for observations in the loading plot in panels A and B indicate the following classes: hesperetin conjugates (Hes\_conj), naringenin conjugates (Nar\_conj), isasakuranetin conjugates (Isok\_conj), diosmetin conjugates (Dios\_conj), apigenin conjugates (Api\_conj), 3',4'-hydroxycinnamic acids (3',4'-DiHCAs), 2'-hydroxycinnamic acids (2'-HCAs), 3'-hydroxycinnamic acids (3'-HCAs), 4'-hydroxycinnamic acids (4'-HCAs), 3',4'-dihydroxyphenylpropanoic acids (3',4'-DiHPPAs), hydroxyphenylpropanoic acids (HPPAs), phenylhydracrylic acids (3-OH-PPAs), hydroxyphenylhydracrylic acids (3-OH-HPPAs), 3',4'-hydroxyphenylacetic acids (3',4'-DiHPAAs), 3'-hydroxyphenylacetic acids (3'-HPAAs), 4'-hydroxyphenylacetic acids (4'-HPAAs), 3,4-dihydroxybenzoic acids (3,4-DiHBAs), 3-hydroxybenzoic acids (3-HBAs), 4-hydroxybenzoic acids (4-HBAs), hippuric acids (HAs), hydroxybenzaldehydes (OH-BALs), 1,3,5-trihydroxybenzenes (1,3,5-TriOH-BZs), 1,2-dihydroxybenzenes (1,2-DiOH-BZs).



**ESI Figure S2.** Variable Importance in Projection (VIP) scores obtained from the PLS-DA model. The abbreviations used indicate the following classes: hesperetin conjugates (Hes\_conj), naringenin conjugates (Nar\_conj), isasakuranetin conjugates (Isok\_conj), diosmetin conjugates (Dios\_conj), apigenin conjugates (Api\_conj), 3',4'-hydroxycinnamic acids (3',4'-DiHCAs), 2'-hydroxycinnamic acids (2'-HCAs), 3'-hydroxycinnamic acids (3'-HCAs), 4'-hydroxycinnamic acids (4'-HCAs), 3',4'-dihydroxyphenylpropanoic acids (3',4'-DiHPPAs), hydroxyphenylpropanoic acids (HPPAs), phenylhydracrylic acids (3-OH-PPAs), hydroxyphenylhydracrylic acids (3-OH-HPPAs), 3',4'-hydroxyphenylacetic acids (3',4'-DiHPAAs), 3'-hydroxyphenylacetic acids (3'-HPAAs), 4'-hydroxyphenylacetic acids (4'-HPAAs), 3,4-dihydroxybenzoic acids (3,4-DiHBAs), 3-hydroxybenzoic acids (3-HBAs), 4-hydroxybenzoic acids (4-HBAs), hippuric acids (HAs), hydroxybenzaldehydes (OH-BALs), 1,3,5-trihydroxybenzenes (1,3,5-TriOH-BZs), 1,2-dihydroxybenzenes (1,2-DiOH-BZs).

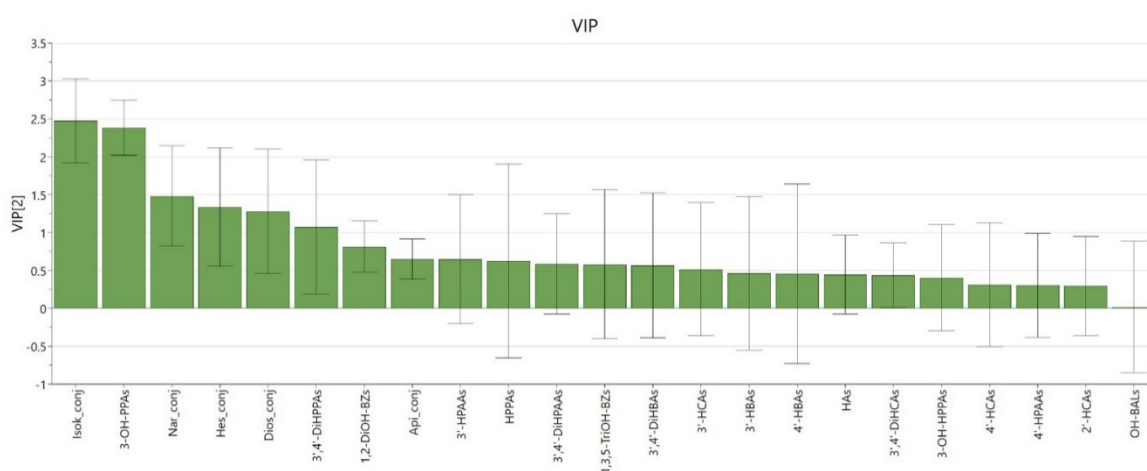

**ESI Figure S3.** ROC plot obtained from the PLS-DA model. TPR and FPR indicate true positive and false positive rates, respectively. Blue color is used for placebo group, red for BBB group.

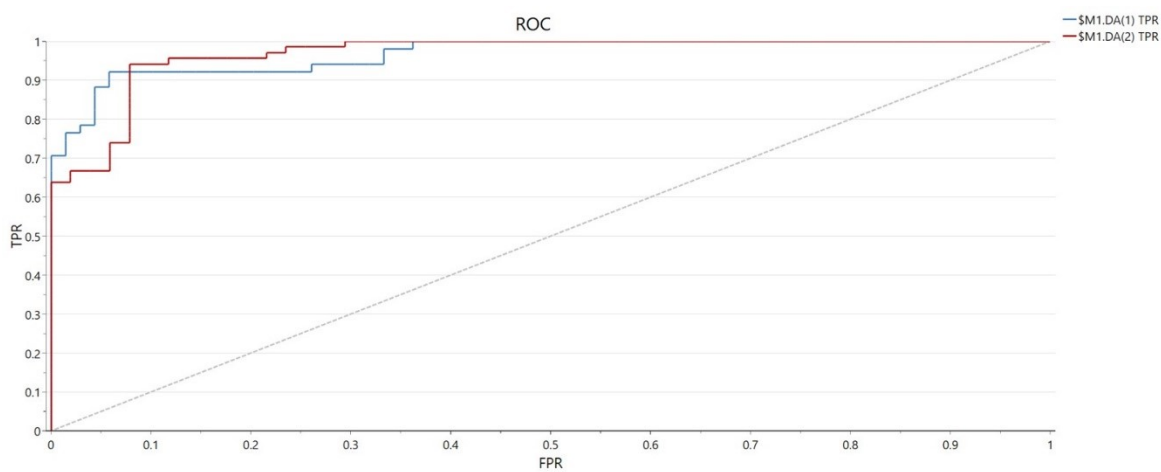

**ESI Figure S4.** Distribution of phenolic classes of bergamot metabolites (without considering hippuric acid derivatives) excreted in urine (A) during the 24 hours after the first intervention day (T1) in the BBB group, (B) during the 24 hours after the first intervention day (T1) in the control group, (C) during the 24 hours after the last day of intervention (T2) in the BBB group, (D) during the 24 hours after the last day of intervention (T2) in the control group.

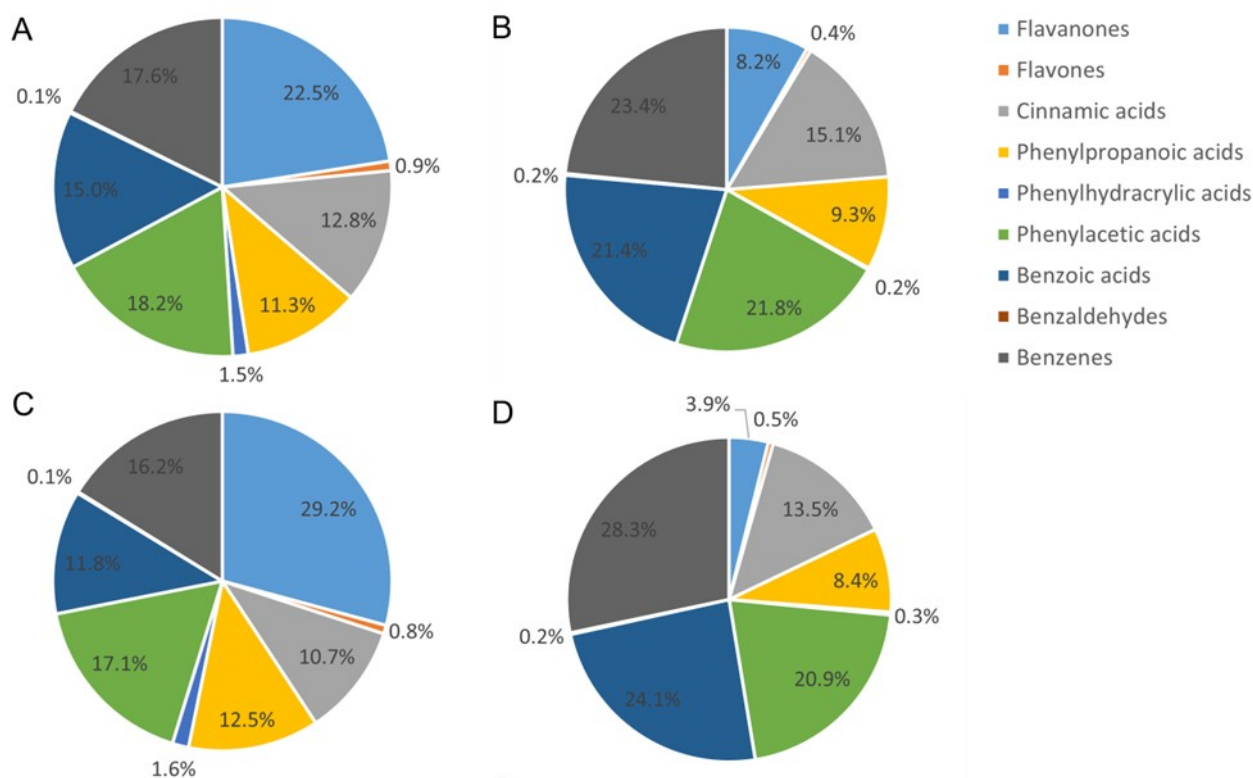

Supplement: d4fo00877d1.pdf [file d4fo00877d1.pdf]
